# Supplementary material for: Orthopedic workforce planning in Germany – an analysis of orthopedic accessibility
Source: PLoS One. 2017 Feb 8;12(2):e0171747. doi: 10.1371/journal.pone.0171747 (PMC5298336; doi:10.1371/journal.pone.0171747)
Supplement: S2 Appendix — (XLSX) [file pone.0171747.s002.xlsx]

## Sheet: Kreise_Versorgungsgrade
Planning Region		Degree of care provision		Accessibility Index		z-score difference
ID	Name	(%)	z-score	Index	z-score
71310	Ahrweiler	124.2	-0.539866	0.00351544	0.233648	-0.773515
97710	Aichach-Friedberg	128.1	-0.396335	0.00255734	-0.262328	-0.134006
84250	Alb-Donau-Kreis	116.1	-0.837971	0.0023487	-0.370333	-0.467637
160770	Altenburg, Stadt	120	-0.694439	0.00317923	0.0596066	-0.754046
71320	Altenkirchen (Westerwald)	129.3	-0.352171	0.00236864	-0.360012	0.00784078
150810	Altmarkkreis Salzwedel	120.6	-0.672357	0.00139255	-0.865303	0.192946
91710	Altötting	178.3	1.45118	0.00330267	0.123508	1.32767
73310	Alzey-Worms/Worms	145.4	0.240357	0.00444941	0.717137	-0.47678
93710	Amberg-Sulzbach/Amberg	148.3	0.347086	0.00284576	-0.113023	0.460108
34510	Ammerland	111.8	-0.996223	0.00173904	-0.685941	-0.310283
350884	Bitterfeld-Wolfen, Stadt	119.9	-0.698119	0.00272396	-0.176076	-0.522043
97720	Augsburg, Landkreis	129.6	-0.34113	0.00236792	-0.360386	0.0192555
34520	Aurich/Emden	129.9	-0.330089	0.00098833	-1.07456	0.744469
73320	Bad Dürkheim/Neustadt	143.2	0.15939	0.00400562	0.487404	-0.328013
96720	Bad Kissingen	113.5	-0.933658	0.00184292	-0.632163	-0.301496
71330	Bad Kreuznach	152.3	0.494298	0.00309523	0.0161217	0.478176
91730	Bad Tölz-Wolfratshausen	195.7	2.09155	0.00859782	2.86465	-0.773099
120600	Barnim	119.5	-0.71284	0.00392924	0.447862	-1.1607
340906	Hoyerswerda, Stadt / LK Kamenz	129.1	-0.359532	0.00181482	-0.646708	0.287177
91720	Berchtesgadener Land	183	1.62415	0.0048425	0.920629	0.70352
64310	Bergstraße	162.2	0.858647	0.00426359	0.620947	0.2377
72310	Bernkastel-Wittlich	106.9	-1.17656	0.00147491	-0.82267	-0.353888
84260	Biberach	116.4	-0.82693	0.00287911	-0.0957567	-0.731173
71340	Birkenfeld	144.6	0.210915	0.00220975	-0.442268	0.653182
81150	Böblingen	138.3	-0.0209442	0.00312327	0.030638	-0.0515822
84350	Bodenseekreis	194.5	2.04738	0.00299109	-0.0377895	2.08517
150830	Börde	118.8	-0.738603	0.00251888	-0.282241	-0.456362
55540	Borken	125.7	-0.484662	0.00275106	-0.162045	-0.322617
83150	Breisgau-Hochschwarzwald	117.9	-0.771725	0.00341819	0.183307	-0.955032
150840	Burgenlandkreis	132.7	-0.227041	0.00252939	-0.276798	0.0497566
82350	Calw	177.7	1.42909	0.00240266	-0.342401	1.77149
33510	Celle	147.6	0.321324	0.00305904	-0.0026128	0.323936
93720	Cham	114.8	-0.885814	0.00170514	-0.703486	-0.182328
145110	Chemnitz, Stadt	125.5	-0.492022	0.00229857	-0.396286	-0.0957368
34530	Cloppenburg	128.6	-0.377933	0.00230317	-0.393905	0.015972
71350	Cochem-Zell	122	-0.620833	0.00187974	-0.613101	-0.00773157
55580	Coesfeld	163.7	0.913852	0.00403689	0.503587	0.410265
33520	Cuxhaven	139.8	0.0342602	0.00205902	-0.520297	0.554557
91740	Dachau	135.1	-0.138714	0.00627874	1.66413	-1.80284
120610	Dahme-Spreewald	112.1	-0.985183	0.00265004	-0.214339	-0.770844
64320	Darmstadt-Dieburg	150.9	0.442773	0.0025208	-0.281243	0.724016
92710	Deggendorf	147.3	0.310283	0.00217459	-0.460468	0.770751
32510	Diepholz/Delmenhorst	118.9	-0.734922	0.00202856	-0.536064	-0.198858
97730	Dillingen a.d.Donau	117.1	-0.801168	0.00182623	-0.640803	-0.160365
92790	Dingolfing-Landau	133.1	-0.21232	0.00248048	-0.302116	0.0897962
10510	Dithmarschen	112.9	-0.95574	0.00122645	-0.951289	-0.00445136
97790	Donau-Ries	121.8	-0.628194	0.00142942	-0.846221	0.218027
73330	Donnersbergkreis	95.9	-1.58139	0.00295835	-0.0547402	-1.52665
146120	Dresden, Stadt	119.7	-0.70548	0.00324379	0.093027	-0.798507
53580	Düren	127.8	-0.407376	0.00477126	0.883748	-1.29112
91750	Ebersberg	186.7	1.76032	0.00935643	3.25735	-1.49703
160611	Leinefelde-Worbis, Stadt	181.5	1.56894	0.00238302	-0.35257	1.92151
91760	Eichstätt	121.3	-0.646595	0.00174087	-0.684991	0.0383961
72320	Eifelkreis Bitburg-Prüm	112	-0.988863	0.000825327	-1.15894	0.170077
120620	Elbe-Elster	118.5	-0.749643	0.00115534	-0.9881	0.238457
83160	Emmendingen	117.5	-0.786446	0.00456187	0.775355	-1.5618
34540	Emsland	139.9	0.0379405	0.00194835	-0.577582	0.615523
59540	Ennepe-Ruhr-Kreis	142.3	0.126268	0.00514824	1.0789	-0.952634
82360	Enzkreis	125.2	-0.503063	0.00303016	-0.0175667	-0.485497
91770	Erding	195.5	2.08419	0.00736092	2.22434	-0.140151
53620	Rhein-Erft-Kreis	121	-0.657636	0.00698511	2.02979	-2.68743
95720	Erlangen-Höchstadt	134.4	-0.164476	0.00342171	0.185131	-0.349607
3402369	Mittlerer Erzgebirgskreis	126.1	-0.469941	0.00231848	-0.385978	-0.0839623
81160	Esslingen	120.1	-0.690759	0.00319857	0.0696144	-0.760373
53660	Euskirchen	119.7	-0.70548	0.00434578	0.663491	-1.36897
94740	Forchheim	143.9	0.185152	0.00362155	0.288581	-0.103428
91780	Freising	151.4	0.461175	0.00694987	2.01155	-1.55037
82370	Freudenstadt	94.4	-1.6366	0.00194522	-0.579205	-1.05739
92720	Freyung-Grafenau	123.4	-0.569309	0.00145057	-0.835273	0.265964
34550	Friesland/Wilhelmshaven	144.8	0.218275	0.00185103	-0.627966	0.846241
66310	Fulda	145	0.225636	0.0013629	-0.880655	1.10629
91790	Fürstenfeldbruck	140.6	0.0637026	0.00618393	1.61505	-1.55134
95730	Fürth	139.9	0.0379405	0.00332517	0.135152	-0.0972117
91800	Garmisch-Partenkirchen	190	1.88177	0.00542091	1.22005	0.661716
73340	Germersheim	135.9	-0.109271	0.00300552	-0.0303204	-0.078951
65310	Gießen	199.9	2.24612	0.00211774	-0.489898	2.73602
31510	Gifhorn	95.6	-1.59243	0.0017556	-0.677365	-0.915067
81170	Göppingen	131.7	-0.263844	0.00234554	-0.371969	0.108125
340916	Görtlitz, Stadt / Niederschl. Oberlausitzkreis	109.4	-1.08455	0.0010331	-1.05138	-0.0331678
31530	Goslar	127	-0.436818	0.00238836	-0.349804	-0.0870137
160670	Gotha, Stadt	120.5	-0.676037	0.0020963	-0.500997	-0.17504
31520	Göttingen	146.5	0.28084	0.00235074	-0.36928	0.65012
34560	Grafschaft Bentheim	162.1	0.854967	0.0013792	-0.872218	1.72718
160760	Greiz, Stadt	133.5	-0.197599	0.00291878	-0.0752242	-0.122374
64330	Groß-Gerau	118.5	-0.749643	0.00471209	0.853122	-1.60277
97740	Günzburg	121.2	-0.650275	0.00262345	-0.228104	-0.422171
57540	Gütersloh	136.3	-0.0945502	0.00277274	-0.150825	0.0562744
150020	Halle (Saale), Stadt	129.2	-0.355851	0.0022403	-0.426452	0.0706004
32520	Hameln-Pyrmont	96.6	-1.55563	0.00283755	-0.117272	-1.43836
33530	Harburg	120.7	-0.668677	0.00450583	0.746345	-1.41502
150850	Harz	115.8	-0.849011	0.00204462	-0.527749	-0.321263
96740	Haßberge	129.2	-0.355851	0.00184788	-0.629594	0.273743
120630	Havelland	118.9	-0.734922	0.00250709	-0.288341	-0.446582
33580	Heidekreis	114.7	-0.889495	0.00278083	-0.146637	-0.742858
81350	Heidenheim	119.9	-0.698119	0.00184354	-0.631844	-0.066275
81250	Heilbronn	117	-0.804848	0.00223646	-0.428441	-0.376406
53700	Heinsberg	142.3	0.126268	0.00347224	0.211287	-0.0850195
31540	Helmstedt	134.4	-0.164476	0.00222613	-0.433786	0.26931
57580	Herford	115.4	-0.863733	0.00275221	-0.16145	-0.702283
66320	Hersfeld-Rotenburg	136.2	-0.0982305	0.00164453	-0.734865	0.636634
10530	Herzogtum Lauenburg	106	-1.20968	0.00304994	-0.00732281	-1.20236
160690	Hildburghausen, Stadt	126.3	-0.46258	0.00154575	-0.785999	0.323419
32540	Hildesheim	127.5	-0.418417	0.00349661	0.223905	-0.642321
59580	Hochsauerlandkreis	117.6	-0.782766	0.00152916	-0.794588	0.0118217
64340	Hochtaunuskreis	148.8	0.365487	0.00447717	0.731508	-0.366021
81260	Hohenlohekreis	112.6	-0.966781	0.00196269	-0.570159	-0.396622
32550	Holzminden	127.8	-0.407376	0.00144935	-0.835901	0.428525
57620	Höxter	119.1	-0.727562	0.0016157	-0.749787	0.0222254
160700	Ilmenau, Stadt	117.4	-0.790127	0.0019052	-0.599923	-0.190204
150860	Jerichower Land	124.4	-0.532506	0.00251385	-0.28484	-0.247666
82150	Karlsruhe	138	-0.0319851	0.00329692	0.120527	-0.152512
66330	Kassel	133.8	-0.186558	0.00221759	-0.438206	0.251649
92730	Kelheim	118.1	-0.764365	0.00276217	-0.156293	-0.608071
96750	Kitzingen	196.5	2.12099	0.00247873	-0.303023	2.42401
51540	Kleve	112.2	-0.981502	0.00301657	-0.0246014	-0.956901
83350	Konstanz	207.6	2.5295	0.00204227	-0.528966	3.05847
95710	Kreis u. Stadt Ansbach	149	0.372848	0.00212479	-0.486246	0.859094
96710	Kreis u. Stadt Aschaffenburg	112.2	-0.981502	0.00245412	-0.315765	-0.665737
94710	Kreis u. Stadt Bamberg	209.2	2.58839	0.00254201	-0.270267	2.85865
94720	Kreis u. Stadt Bayreuth	195.6	2.08787	0.00251826	-0.282561	2.37043
94730	Kreis u. Stadt Coburg	128.7	-0.374253	0.00206182	-0.518846	0.144593
94750	Kreis u. Stadt Hof	170	1.14571	0.00244441	-0.32079	1.4665
73350	Kreis u. Stadt Kaiserslautern	172.5	1.23772	0.00304242	-0.0112177	1.24894
92740	Kreis u. Stadt Landshut	158.2	0.711435	0.00284206	-0.114938	0.826373
92750	Kreis u. Stadt Passau	157.8	0.696714	0.00227619	-0.40787	1.10458
91870	Kreis u. Stadt Rosenheim	226.1	3.21036	0.00518729	1.09912	2.11124
96780	Kreis u. Stadt Schweinfurt	157.7	0.693034	0.00264157	-0.218723	0.911757
94760	Kronach	127.3	-0.425777	0.00166365	-0.724964	0.299187
97610	Augsburg, Stadt	156.7	0.656231	0.00222712	-0.433275	1.08951
110000	Berlin	134	-0.179197	0.012761	5.0198	-5.199
57110	Bielefeld, Stadt	122.8	-0.591391	0.00238164	-0.353283	-0.238107
59130	Dortmund, Stadt	134.5	-0.160796	0.00727793	2.18138	-2.34217
53140	Bonn, Stadt	158.2	0.711435	0.00663577	1.84895	-1.13752
55120	Bottrop, Stadt	135.5	-0.123993	0.00350108	0.226214	-0.350207
31010	Braunschweig, Stadt	129.9	-0.330089	0.00174205	-0.684382	0.354293
40110	Bremen, Stadt	127.4	-0.422097	0.00261264	-0.233704	-0.188393
40120	Bremerhaven, Stadt	138.9	0.00113755	0.00282113	-0.125775	0.126912
64110	Darmstadt, Wissenschaftsstadt	144.9	0.221955	0.00279896	-0.137251	0.359206
59130	Dortmund, Stadt	134.5	-0.160796	0.00417729	0.57627	-0.737065
51120	Duisburg, Stadt	123.9	-0.550907	0.00356681	0.260244	-0.811151
51110	Düsseldorf, Stadt	129.1	-0.359532	0.00765381	2.37596	-2.73549
160510	Erfurt, Stadt	130.2	-0.319048	0.00231422	-0.388183	0.0691343
95620	Erlangen	204.7	2.42277	0.00407286	0.522208	1.90057
51130	Essen, Stadt	128.2	-0.392654	0.0050034	1.00392	-1.39658
64120	Frankfurt am Main, Stadt	125.6	-0.488342	0.00700346	2.03929	-2.52764
83110	Freiburg im Breisgau	173.4	1.27084	0.00507364	1.04029	0.230555
95630	Fürth, Stadt	191.8	1.94802	0.00395333	0.460335	1.48768
55130	Gelsenkirchen, Stadt	122.5	-0.602431	0.00424851	0.613141	-1.21557
59140	Hagen, Stadt	143.2	0.15939	0.00389122	0.428178	-0.268788
20000	Hamburg, Freie und Hansestadt	125	-0.510424	0.00684089	1.95514	-2.46556
59150	Hamm, Stadt	128.5	-0.381614	0.00336416	0.155337	-0.53695
82210	Heidelberg	211.9	2.68776	0.00520103	1.10623	1.58153
81210	Heilbronn, Stadt	131.9	-0.256483	0.00247753	-0.303645	0.0471619
59160	Herne, Stadt	130	-0.326409	0.005572	1.29827	-1.62468
91610	Ingolstadt	134.4	-0.164476	0.00231709	-0.386697	0.222221
160530	Jena, Stadt	131.3	-0.278565	0.00273763	-0.168996	-0.109569
82120	Karlsruhe, Stadt	131.3	-0.278565	0.00263725	-0.22096	-0.0576056
66110	Kassel, documenta-Stadt	139.1	0.00849814	0.00237292	-0.357799	0.366298
10020	Kiel, Landeshauptstadt	175.4	1.34445	0.00387826	0.421472	0.922975
71110	Koblenz, kreisfreie Stadt	167.2	1.04266	0.00253548	-0.273643	1.31631
53150	Köln, Stadt	125.9	-0.477301	0.0116868	4.46369	-4.94099
51140	Krefeld, Stadt	144.1	0.192513	0.00414848	0.561359	-0.368845
53160	Leverkusen, Stadt	224.7	3.15883	0.00673771	1.90172	1.25711
10030	Lübeck, Hansestadt	150.9	0.442773	0.0025051	-0.289371	0.732144
73140	Ludwigshafen am Rhein, kreisfreie	123.1	-0.58035	0.00418732	0.581464	-1.16181
73150	Mainz, kreisfreie Stadt	124	-0.547227	0.00513077	1.06986	-1.61708
82220	Mannheim	139.7	0.0305799	0.00444436	0.714525	-0.683945
51160	Mönchengladbach, Stadt	127.4	-0.422097	0.0029747	-0.046275	-0.375822
51170	Mülheim an der Ruhr, Stadt	145	0.225636	0.00550706	1.26465	-1.03902
91620	München, Landeshauptstadt	178.5	1.45854	0.0225231	10.0734	-8.61482
55150	Münster, Stadt	121.7	-0.631874	0.00299732	-0.0345624	-0.597311
95640	Nürnberg	128.2	-0.392654	0.00405574	0.513346	-0.906001
51190	Oberhausen, Stadt	132.3	-0.241762	0.00364875	0.302661	-0.544423
64130	Offenbach am Main, Stadt	133.6	-0.193918	0.00488222	0.941192	-1.13511
34030	Oldenburg (Oldenburg), Stadt	139.8	0.0342602	0.00252525	-0.27894	0.3132
34040	Osnabrück, Stadt	141.5	0.0968253	0.0022595	-0.41651	0.513335
82310	Pforzheim	131.6	-0.267524	0.00350667	0.229109	-0.496633
120540	Potsdam, Stadt	136.7	-0.079829	0.00511223	1.06026	-1.14009
93620	Regensburg, Stadt	182.5	1.60575	0.00320988	0.0754694	1.53028
51200	Remscheid, Stadt	209.4	2.59575	0.00453243	0.760117	1.83563
130580	Nordwestmecklenburg/Schwerin	157.3	0.678313	0.00242101	-0.332901	1.01121
51220	Solingen, Stadt	213	2.72824	0.00464186	0.816764	1.91147
81110	Stuttgart	134.6	-0.157115	0.005449	1.2346	-1.39171
72110	Trier, kreisfreie Stadt	158.4	0.718796	0.00134038	-0.89231	1.61111
84210	Ulm	150.7	0.435413	0.00210263	-0.497718	0.933131
64140	Wiesbaden, Landeshauptstadt	126	-0.473621	0.00642706	1.74091	-2.21453
31030	Wolfsburg, Stadt	124.5	-0.528825	0.0023962	-0.345745	-0.18308
51240	Wuppertal, Stadt	132.1	-0.249123	0.00362037	0.28797	-0.537092
96630	Würzburg, Stadt	210.5	2.63623	0.00238929	-0.349326	2.98556
94770	Kulmbach	160.5	0.796082	0.00231942	-0.385491	1.18157
73360	Kusel	115.8	-0.849011	0.00256035	-0.260772	-0.588239
160650	Sondershausen, Stadt	118.5	-0.749643	0.0018765	-0.614778	-0.134865
65320	Lahn-Dill-Kreis	113.3	-0.941019	0.0019081	-0.59842	-0.342599
130530	Güstrow	122.8	-0.591391	0.00131707	-0.904379	0.312988
91810	Landsberg am Lech	117.1	-0.801168	0.00464894	0.820427	-1.62159
34570	Leer	112.9	-0.95574	0.00167399	-0.719614	-0.236126
340912	Muldentalkreis	114.5	-0.896855	0.00328005	0.111796	-1.00865
147130	Leipzig, Stadt	123.8	-0.554588	0.00355559	0.254437	-0.809025
94780	Lichtenfels	123.6	-0.561948	0.0022251	-0.434319	-0.127629
65330	Limburg-Weilburg	124.2	-0.539866	0.00339325	0.170397	-0.710263
97760	Lindau (Bodensee)	179.6	1.49902	0.00369935	0.328856	1.17016
57660	Lippe	113	-0.95206	0.0023356	-0.377115	-0.574945
83360	Lörrach	121.6	-0.635554	0.00223687	-0.428227	-0.207327
33540	Lüchow-Dannenberg	206.1	2.4743	0.00108931	-1.02229	3.49658
81180	Ludwigsburg	112.3	-0.977822	0.00298797	-0.0394069	-0.938415
73380	Ludwigshafen/Frankenthal/Speyer	130.4	-0.311688	0.00450333	0.745053	-1.05674
130540	Ludwigslust	114.5	-0.896855	0.00148356	-0.818193	-0.078662
33550	Lüneburg	155.9	0.626788	0.00287338	-0.0987244	0.725513
150030	Magdeburg, Landeshauptstadt	129.5	-0.344811	0.00277679	-0.148729	-0.196082
64350	Main-Kinzig-Kreis	116.8	-0.812208	0.00209275	-0.502832	-0.309376
96770	Main-Spessart	124.7	-0.521465	0.00184992	-0.628537	0.107072
81280	Main-Tauber-Kreis	201.2	2.29396	0.00228918	-0.401149	2.69511
64360	Main-Taunus-Kreis	170.8	1.17515	0.00632613	1.68866	-0.513507
73390	Mainz-Bingen	119.9	-0.698119	0.00452399	0.755748	-1.45387
150870	Mansfeld-Südharz	139.6	0.0268996	0.00207368	-0.512703	0.539603
65340	Marburg-Biedenkopf	130	-0.326409	0.00128143	-0.922829	0.59642
120640	Märkisch-Oderland	124.6	-0.525145	0.00233985	-0.374919	-0.150226
59620	Märkischer Kreis	138.3	-0.0209442	0.00281249	-0.130247	0.109303
71370	Mayen-Koblenz	112.7	-0.963101	0.00222792	-0.432862	-0.530239
130560	Müritz	148.2	0.343405	0.0009625	-1.08793	1.43133
340907	Riesa-Großenhain	121.5	-0.639234	0.00223233	-0.430578	-0.208656
100420	Merzig-Wadern	127	-0.436818	0.00287664	-0.0970359	-0.339782
51580	Mettmann	140.4	0.056342	0.00604338	1.54229	-1.48594
91820	Miesbach	287.1	5.45534	0.00970336	3.43695	2.01839
96760	Miltenberg	124.4	-0.532506	0.00182006	-0.643999	0.111493
57700	Minden-Lübbecke	135.2	-0.135034	0.00251407	-0.284727	0.149693
340905	Mittweida	125.7	-0.484662	0.00260028	-0.240102	-0.244559
91830	Mühldorf a.Inn	167.8	1.06474	0.0038995	0.432466	0.632278
91840	München	169.6	1.13099	0.0126602	4.96761	-3.83662
82250	Neckar-Odenwald-Kreis	118.5	-0.749643	0.00221528	-0.439402	-0.310241
97750	Neu-Ulm	115.9	-0.845331	0.00235266	-0.368284	-0.477048
91850	Neuburg-Schrobenhausen	146.3	0.27348	0.00173083	-0.690189	0.963668
93730	Neumarkt i.d.OPf.	148.2	0.343405	0.00294963	-0.0592543	0.40266
100430	Neunkirchen	164	0.924893	0.00461053	0.800543	0.124349
51620	Rhein-Kreis Neuss	158.8	0.733517	0.0058599	1.44731	-0.71379
95750	Neustadt a.d.Aisch-Bad Windsheim	115.8	-0.849011	0.0027663	-0.154158	-0.694853
93740	Neustadt a.d.Waldnaab/Weiden	121.7	-0.631874	0.00159324	-0.761417	0.129543
71380	Neuwied	118.1	-0.764365	0.00331773	0.1313	-0.895664
32560	Nienburg (Weser)	108	-1.13607	0.00210322	-0.497414	-0.638661
10540	Nordfriesland	113.7	-0.926298	0.00074922	-1.19834	0.27204
160620	Nordhausen, Stadt	161.6	0.836565	0.00185451	-0.626165	1.46273
340913	Torgau-Oschatz	118.1	-0.764365	0.00215366	-0.4713	-0.293065
130580	Nordwestmecklenburg/Schwerin	157.3	0.678313	0.00237255	-0.35799	1.0363
31550	Northeim	125.3	-0.499383	0.00206799	-0.515649	0.0162663
95740	Nürnberger Land	126.7	-0.447859	0.00335889	0.152609	-0.600468
97800	Oberallgäu/Kempten	187.2	1.77872	0.00326363	0.103295	1.67543
53740	Oberbergischer Kreis	143.9	0.185152	0.00386409	0.414138	-0.228985
120650	Oberhavel	130.7	-0.300647	0.00357268	0.263281	-0.563928
120660	Oberspreewald-Lausitz	119.5	-0.71284	0.00153348	-0.79235	0.0795092
64370	Odenwaldkreis	142.1	0.118907	0.0026203	-0.229738	0.348645
120670	Oder-Spree/Frankfurt	115.8	-0.849011	0.00250482	-0.289518	-0.559493
64380	Offenbach	115.3	-0.867413	0.0040258	0.497846	-1.36526
34580	Oldenburg	116.6	-0.819569	0.00252243	-0.280402	-0.539167
59660	Olpe	116.3	-0.83061	0.00178259	-0.663394	-0.167216
83170	Ortenaukreis	113.4	-0.937339	0.00247282	-0.306081	-0.631257
34590	Osnabrück	129	-0.363212	0.00243344	-0.326466	-0.0367459
81360	Ostalbkreis	113.7	-0.926298	0.00152556	-0.796448	-0.129849
97770	Ostallgäu/Kaufbeuren	162.5	0.869688	0.00288832	-0.0909882	0.960676
33560	Osterholz	131.4	-0.274885	0.00277795	-0.148124	-0.126761
31560	Osterode am Harz	121.2	-0.650275	0.001757	-0.676638	0.026363
10550	Ostholstein	185.1	1.70144	0.00257151	-0.254993	1.95643
120680	Ostprignitz-Ruppin	118	-0.768045	0.00138405	-0.869706	0.101661
57740	Paderborn	116.3	-0.83061	0.00209365	-0.502368	-0.328242
31570	Peine	143.2	0.15939	0.00320991	0.0754877	0.0839027
91860	Pfaffenhofen a.d.Ilm	209.2	2.58839	0.00342635	0.187529	2.40086
10560	Pinneberg	165.1	0.965376	0.00443978	0.712156	0.25322
10570	Plön	117.5	-0.786446	0.00360383	0.279407	-1.06585
120690	Potsdam-Mittelmark/Brandenburg	114.9	-0.882134	0.00302684	-0.0192824	-0.862852
120700	Prignitz	145.9	0.258758	0.000988786	-1.07432	1.33308
82160	Rastatt/Baden-Baden	146.2	0.269799	0.0030418	-0.0115404	0.28134
84360	Ravensburg	159.4	0.755599	0.00301653	-0.0246211	0.78022
55620	Recklinghausen	127.5	-0.418417	0.00384621	0.404878	-0.823295
92760	Regen	124.9	-0.514104	0.00150867	-0.805195	0.291091
93750	Regensburg, Landkreis	119	-0.731242	0.00285448	-0.108509	-0.622733
32412	Hannover	114	-0.915257	0.0044445	0.714595	-1.62985
100410	Regionalverband Saarbrücken	137.3	-0.0577472	0.00409819	0.535323	-0.59307
81190	Rems-Murr-Kreis	125.1	-0.506744	0.00272306	-0.176542	-0.330202
10580	Rendsburg-Eckernförde/Neumünster	158.1	0.707755	0.00313769	0.0380992	0.669656
84150	Reutlingen	126.1	-0.469941	0.00207422	-0.512428	0.0424872
71400	Rhein-Hunsrück-Kreis	117.6	-0.782766	0.00232115	-0.3846	-0.398166
71410	Rhein-Lahn-Kreis	127.9	-0.403695	0.00267932	-0.199182	-0.204514
82260	Rhein-Neckar-Kreis	126.5	-0.455219	0.00463993	0.815767	-1.27099
53820	Rhein-Sieg-Kreis	149.6	0.39493	0.0046025	0.79639	-0.401461
64390	Rheingau-Taunus-Kreis	156.9	0.663591	0.00459562	0.792826	-0.129234
53780	Rheinisch-Bergischer Kreis	151.5	0.464855	0.0051675	1.08887	-0.624015
96730	Rhön-Grabfeld	126.5	-0.455219	0.00134334	-0.890782	0.435562
33570	Rotenburg (Wümme)	130	-0.326409	0.00211934	-0.489067	0.162658
95760	Roth/Schwabach	146.5	0.28084	0.00310247	0.0198707	0.26097
92770	Rottal-Inn	121.9	-0.624513	0.00266863	-0.20472	-0.419794
83250	Rottweil	123.5	-0.565628	0.00204053	-0.529864	-0.0357642
160740	Eisenberg, Stadt	183.6	1.64623	0.00260841	-0.235889	1.88212
160750	Pößneck, Stadt	124.1	-0.543547	0.00196265	-0.570184	0.0266373
150880	Saalekreis	113.1	-0.94838	0.00240305	-0.342199	-0.606181
160730	Saalfeld/Saale, Stadt	123.1	-0.58035	0.00191575	-0.594463	0.0141133
100450	Saarpfalz-Kreis	214.9	2.79816	0.00387821	0.421445	2.37672
100440	Saarlouis	180	1.51374	0.00385451	0.409174	1.10457
340908	Sächsische Schweiz	132.7	-0.227041	0.00262324	-0.228213	0.00117236
150890	Salzlandkreis	138.7	-0.00622305	0.00291134	-0.0790754	0.0728523
100460	St. Wendel	117	-0.804848	0.00345626	0.203016	-1.00786
32570	Schaumburg	116.2	-0.83429	0.00337125	0.159009	-0.993299
10590	Schleswig-Flensburg/Flensburg	165.2	0.969056	0.00233665	-0.376574	1.34563
160540	Suhl, Stadt	170.9	1.17883	0.00155849	-0.779404	1.95824
81270	Schwäbisch Hall	103.7	-1.29433	0.00173049	-0.690367	-0.603961
66340	Schwalm-Eder-Kreis	130.2	-0.319048	0.0020855	-0.506588	0.187539
93760	Schwandorf	134.6	-0.157115	0.00232756	-0.381282	0.224166
83260	Schwarzwald-Baar-Kreis	195.4	2.08051	0.00200456	-0.548487	2.62899
10600	Segeberg	126.5	-0.455219	0.00397629	0.472216	-0.927435
59700	Siegen-Wittgenstein	117.4	-0.790127	0.0013982	-0.862379	0.0722525
84370	Sigmaringen	133	-0.216	0.00206326	-0.5181	0.3021
59740	Soest	142.8	0.144669	0.00236214	-0.363378	0.508048
160680	Sömmerda, Stadt	128.7	-0.374253	0.00195534	-0.573964	0.199712
160720	Sonneberg, Stadt	199.7	2.23876	0.00180757	-0.650462	2.88922
120710	Spree-Neiße	128.2	-0.392654	0.00153276	-0.792722	0.400068
33590	Stade	148.9	0.369167	0.00257223	-0.254622	0.623789
53342	Aachen	136	-0.105591	0.00341783	0.183119	-0.28871
91880	Starnberg	203	2.36021	0.00887253	3.00686	-0.646647
10610	Steinburg	153	0.52006	0.00318764	0.0639584	0.456101
55660	Steinfurt	135	-0.142394	0.00285544	-0.108011	-0.0343835
150900	Stendal	118.4	-0.753324	0.00119531	-0.967409	0.214085
10620	Stormarn	114.3	-0.904216	0.00434871	0.665008	-1.56922
92780	Straubing-Bogen/Straubing	195.8	2.09523	0.00313391	0.0361433	2.05908
73370	Südliche Weinstraße/Landau	120.3	-0.683398	0.0032427	0.092461	-0.775859
73400	Südwestpfalz/Pirmasens/Zweibrücken	136.3	-0.0945502	0.00277551	-0.149389	0.0548387
120720	Teltow-Fläming	130.1	-0.322729	0.00369998	0.32918	-0.651909
93770	Tirschenreuth	112	-0.988863	0.00148643	-0.816706	-0.172157
91890	Traunstein	187.5	1.78976	0.00465692	0.824559	0.965204
72350	Trier-Saarburg	112.3	-0.977822	0.00154551	-0.786121	-0.191701
84160	Tübingen	126.5	-0.455219	0.00219959	-0.447527	-0.00769242
83270	Tuttlingen	126.5	-0.455219	0.00193843	-0.582721	0.127501
130030	Rostock	136.5	-0.0871896	0.000544269	-1.30444	1.21725
33600	Uelzen	138.1	-0.0283048	0.00169904	-0.706645	0.678341
59780	Unna	140.1	0.0453011	0.0036711	0.314232	-0.268931
160640	Mühlhausen/Thüringen, Stadt	156.8	0.659911	0.00218691	-0.454089	1.114
97780	Unterallgäu/Memmingen	100.5	-1.4121	0.00267838	-0.199669	-1.21243
34600	Vechta	114.3	-0.904216	0.00292315	-0.0729582	-0.831258
33610	Verden	121.3	-0.646595	0.0023087	-0.391045	-0.25555
51660	Viersen	123.2	-0.576669	0.00316834	0.0539686	-0.630638
65350	Vogelsbergkreis	120.9	-0.661316	0.00122129	-0.953962	0.292646
340915	Plauen, Stadt / Vogtlandkreis	170.7	1.17147	0.00308432	0.0104729	1.161
130590	Ostvorpommern	149.8	0.40229	0.000563608	-1.29442	1.69671
130570	Nordvorpommern	123.8	-0.554588	0.00097851	-1.07964	0.525054
72330	Vulkaneifel	153.5	0.538461	0.00172225	-0.694631	1.23309
66350	Waldeck-Frankenberg	116.4	-0.82693	0.00178503	-0.662129	-0.164801
83370	Waldshut	90.9	-1.76541	0.000750092	-1.19789	-0.567519
55700	Warendorf	155	0.593666	0.00331959	0.132263	0.461403
160560	Eisenach, Stadt	138.4	-0.0172639	0.00161122	-0.752109	0.734845
91900	Weilheim-Schongau	223.1	3.09995	0.00497526	0.989353	2.1106
160550	Weimar, Stadt	144	0.188833	0.00249835	-0.292867	0.4817
95770	Weißenburg-Gunzenhausen	129.2	-0.355851	0.0017263	-0.692531	0.33668
66360	Werra-Meißner-Kreis	194.8	2.05842	0.00256856	-0.256523	2.31495
51700	Wesel	128.8	-0.370573	0.00316642	0.0529713	-0.423544
34610	Wesermarsch	128.5	-0.381614	0.00224676	-0.423108	0.0414941
71430	Westerwaldkreis	114.5	-0.896855	0.00272543	-0.175314	-0.721542
64400	Wetteraukreis	151.8	0.475896	0.0035165	0.234198	0.241698
150910	Wittenberg	119.3	-0.720201	0.00203694	-0.531722	-0.188479
34620	Wittmund	119.2	-0.723881	0.00130017	-0.913129	0.189248
31580	Wolfenbüttel	131.3	-0.278565	0.00214382	-0.476394	0.197829
94790	Wunsiedel i.Fichtelgebirge	122.5	-0.602431	0.00188264	-0.611602	0.00917057
96790	Würzburg, Landkreis	119.8	-0.7018	0.00217871	-0.458336	-0.243464
84170	Zollernalbkreis	115.9	-0.845331	0.00207347	-0.512813	-0.332518
340914	Zwickau	229.9	3.35021	0.00327163	0.107437	3.24277
31020	Salzgitter, Stadt	139.9	0.0379405	0.00259898	-0.240771	0.278711
32411	Hannover, Landeshauptstadt	137.3	-0.0577472	0.00564842	1.33783	-1.39558
53341	Aachen, Stadt	149.4	0.387569	0.00368345	0.320623	0.0669457
120520	Cottbus, Stadt	138.4	-0.0172639	0.00169091	-0.710854	0.69359
130550	Mecklenburg-Strelitz	118.7	-0.742283	0.00060938	-1.27073	0.528446
130520	Demmin	130.3	-0.315368	0.000655054	-1.24709	0.931717
130510	Bad Doberan	116.4	-0.82693	0.002009	-0.546187	-0.280743
130610	Rügen	126.1	-0.469941	0.000449391	-1.35355	0.88361
130620	Uecker-Randow	136.1	-0.101911	0.000354015	-1.40292	1.30101
130600	Parchim	114.7	-0.889495	0.00153017	-0.794064	-0.0954312
3402371	Aue-Schwarzenberg	134.5	-0.160796	0.00316385	0.0516409	-0.212436
3402370	Annaberg	133.4	-0.201279	0.00250301	-0.290455	0.0891764
3402372	Stollberg	153.6	0.542141	0.00313937	0.0389685	0.503173
3402368	Freiberg	119.1	-0.727562	0.00325123	0.0968763	-0.824438
3402364	Döbeln	152.5	0.501658	0.00323216	0.0870053	0.414653
340904	Chemnitzer Land	141.1	0.0821041	0.00281845	-0.127162	0.209266
340917	Bautzen	133.1	-0.21232	0.00188869	-0.608468	0.396148
340918	Löbau-Zittau	122	-0.620833	0.00143258	-0.844585	0.223752
340903	Meißen	125.2	-0.503063	0.00308176	0.00914566	-0.512209
340909	Weißeritzkreis	128.8	-0.370573	0.00332293	0.133995	-0.504568
340911	Leipziger Land	145.4	0.240357	0.00349595	0.22356	0.016797
340910	Delitzsch	156.2	0.637829	0.00327057	0.106889	0.53094
350885	Dessau-Roßlau, Stadt	209.6	2.60311	0.0027522	-0.161455	2.76456
160520	Gera, Stadt	148	0.336045	0.00316597	0.0527415	0.283303
					0.0527415
